1 *Type of submission:* RESEARCH

2 *Title:* Reading eye movements in traumatic brain injury

3 *Authors:*

4 Ashwini V C Reddy \* † §, M Phil Opt

5 Revathy Mani † §, M Phil Opt, FNORA

6 Ambika Selvakumar ¶, DNB, DO

7 Jameel Rizwana Hussaindeen \* † §, PhD, FCOVD-I, FAAO

8

9 \* *Elite School of Optometry, Sankara Nethralaya, Chennai, Tamil Nadu & Birla Institute*  
10 *of Technology and Science, Pilani, Rajasthan, India*

11 † *Binocular Vision & Neuro-Optometry Clinic, Sankara Nethralaya, Chennai, Tamil*  
12 *Nadu, India*

13 § *Srimathi Sundari Subramanian Department of Visual Psychophysics, Sankara*  
14 *Nethralaya, Chennai, Tamil Nadu, India*

15 ¶ *Department of Neuro-Ophthalmology, Sankara Nethralaya, Chennai, Tamil Nadu,*  
16 *India*

17

18 *Running Title:* Reading eye movements in TBI

19

20 *Keywords:* oculomotor dysfunction, ReadAlyzer, reading rate, saccades

21

22 **Background:** The aim of our study was to measure the reading eye movements in  
23 subjects with traumatic brain injury using ReadAlyzer. ReadAlyzer is an objective eye  
24 movement recording device that tracks the eye movements while reading.

25 **Methods:** Reading eye movements were measured using ReadAlyzer in 30 subjects  
26 with traumatic brain injury (mild, moderate and severe) who had binocular vision and  
27 reading related symptoms and 60 asymptomatic controls.

28 **Results:** There was a significant decrease in reading eye movement parameters in  
29 subjects with traumatic brain injury compared to controls. Reading eye movement  
30 parameters were represented in median (IQR). Subjects with traumatic brain injury  
31 presented with an increased number of fixations/100 words: 137 (106-159) and  
32 regressions/100 words: 24 (12-36), and reduced reading rate 154 (128-173) words per  
33 minute. They also had a lesser grade level equivalent: 4.0 (3.0-7.0) and reduced  
34 comprehension: 70 (60-80) percentage (Mann-Whitney U test,  $p < 0.05$ ). Reading eye  
35 movement parameters were significantly affected in mild and moderate-severe  
36 traumatic brain injury subjects compared to controls (Kruskal-Wallis test,  $p < 0.05$ ).

37 **Conclusion:** Reading eye movement performance using ReadAlyzer was found to be  
38 decreased in traumatic brain injury. Reading assessment may serve as a clinical  
39 measure to understand the oculomotor system due to traumatic brain injury.

40

41

42 Reading is one of the most important visual functions in daily living. The act of reading  
43 is highly complex involving an integrated function of oculomotor, sensory, cognitive,  
44 and attentional aspects.<sup>1</sup> Oculomotor system primarily involves execution of vergence,  
45 versions and accommodation during fixations, reading, writing and while viewing any  
46 target in the environment.

47

48 A normal reading is comprised of accurate, rhythmical and spontaneously executed  
49 sequences of saccadic eye movements interspersed with brief fixational pauses.<sup>1,2</sup>  
50 Reading related saccadic eye movements are 1-3 degrees in amplitude and the  
51 saccadic latencies are 30-60 msec.<sup>2</sup> The presence of accurate saccadic tracking,  
52 synchronised ocular accommodation and vergence is required for efficient reading.

53

54 In traumatic brain injury (TBI), multiple brain areas and their functions are adversely  
55 affected because of the diffuse axonal injury (DAI). A physical damage to the  
56 underlying neurons, such as stretching, twisting, and shearing of the neurons can  
57 cause an impairment resulting in a range of sensory, oculomotor, perceptual and  
58 structural abnormalities.<sup>1,3</sup>

59

60 Symptoms following TBI may persist for seconds to minutes after the event and usually  
61 resolve within 12 weeks but may continue for months or even years.<sup>4</sup> Impairment of the  
62 oculomotor subsystem following TBI, also adversely affects the naturalistic pattern of  
63 reading. Ninety per cent of the visually symptomatic mild TBI (mTBI) group exhibited  
64 oculomotor dysfunction (OMD) following the head trauma.<sup>3</sup>

65

66 Reading eye movements are one among the important oculomotor functions that  
67 enable an individual to read or comprehend a paragraph using basic oculomotor  
68 functions. Studies have shown impaired reading eye movement parameters due to  
69 head injuries. Thiagarajan et al., had investigated reading eye movements in mild TBI  
70 using Visagraph and found that the subjects had significantly reduced reading rate, an  
71 increased number of fixations/100words, a higher number of regressions/100words,  
72 and decreased grade-level efficiency.<sup>1</sup> During reading, an individual with TBI exhibits  
73 hypometric saccades (<1-degree amplitude) and increased saccadic latencies (>200  
74 msec).<sup>2</sup> Considering the extensive neural network of the oculomotor subsystems, a  
75 global damage in TBI could compromise precise oculomotor control, leading to reading  
76 dysfunction and an unreceptive quality of life (QoL).<sup>1</sup>

77 The assessment of reading eye movements is highlighted in this study because eye  
78 movements are considered as novel visual biomarkers to predict the high-risk  
79 population from persisting with symptoms of TBI.<sup>5,6</sup> There is a limited literature on  
80 clinically-based evaluation of reading eye movement parameters with objective eye  
81 movement recordings for these individuals in India. Understanding the pattern of  
82 reading eye movements is essential as eye movements are deliberated to be one of  
83 the key elements in assessing the functional integrity of the brain. This assessment can  
84 potentially support early visual intervention in reading dysfunction. Therefore, we  
85 present our study that investigated the impact of TBI on reading eye movements using  
86 ReadAlyzer, an objective eye movement recording device.

## 87 **METHODS**

### 88 **Study Design**

89 A prospective comparative study was conducted between April 2015 and February  
90 2016 in the Neuro-Optometry Clinic at a tertiary eye care center, India. The study  
91 adhered to the tenets of Declaration of Helsinki and the investigational procedures  
92 were reviewed and accepted by the Institutional Review Board and Medical Ethics  
93 Committee.

### 94 **Subjects**

95 Thirty subjects with TBI and 60 controls were included in the study. The sample size  
96 was estimated as 30 subjects diagnosed with TBI and 60 age-matched controls  
97 considering a 1:2 ratio between the cases and the controls. Subjects with TBI were  
98 referred from the Neuro-ophthalmology department if they complained about any one  
99 of the symptoms of reading difficulty, headache, eye strain, dizziness. Age-matched  
100 subjects who volunteered to participate in the study were chosen as controls. Inclusion  
101 and exclusion criteria for the cases and the controls are presented in Table 1. A duly  
102 signed, written informed consent was obtained from all the study participants. All the  
103 subjects received a comprehensive eye examination which included history taking,  
104 refraction, pupillary evaluation, extraocular motility, anterior and posterior segment  
105 examination. This was followed by a detailed neuro-optometric evaluation.

106

107

108

109 **Table 1: Inclusion and Exclusion Criteria for study subjects**

| Subjects        | Inclusion Criteria                                                                                                                                                                                                                                                                                                                                                                                                                                                                                                                                                                                                                                                                                                                                                                                                                                                               | Exclusion Criteria                                                                                                                                                                                                                                                                               |
|-----------------|----------------------------------------------------------------------------------------------------------------------------------------------------------------------------------------------------------------------------------------------------------------------------------------------------------------------------------------------------------------------------------------------------------------------------------------------------------------------------------------------------------------------------------------------------------------------------------------------------------------------------------------------------------------------------------------------------------------------------------------------------------------------------------------------------------------------------------------------------------------------------------|--------------------------------------------------------------------------------------------------------------------------------------------------------------------------------------------------------------------------------------------------------------------------------------------------|
| <b>Cases</b>    | <ul style="list-style-type: none"> <li>• Age range: 18 – 60 years</li> <li>• Best corrected visual acuity <math>\geq</math> 6/9 for distance and N6 for near in worse eye</li> <li>• TBI cases with one or more visual symptoms (For example: a headache, skipping of lines while reading, blur, eye strain) and one clinical sign (For example: receded near point of convergence) of oculomotor or non-strabismic binocular vision anomalies<sup>3</sup></li> <li>• Onset and persistence of visual symptoms at least six months' post-injury<sup>1</sup></li> <li>• Ability to understand the test instructions</li> <li>• Intact visual field with Confrontation and Amsler test</li> <li>• Proficiency with the English language<sup>†</sup></li> <li>• Stable systemic conditions for 5 years (For example: Diabetes Mellitus &amp; Hypertension under control)</li> </ul> | <ul style="list-style-type: none"> <li>• Central or paracentral visual field defects with Confrontation test/Humphrey visual field test that hinder reading performance</li> <li>• Constant strabismus, amblyopia, nystagmus, an ocular disease in either eye (For example: Glaucoma)</li> </ul> |
| <b>Controls</b> | <ul style="list-style-type: none"> <li>• Age range: 18 – 60 years</li> <li>• Proficiency with the English language<sup>†</sup></li> <li>• Normal binocular vision parameters</li> <li>• Non-symptomatic for reading or near work</li> <li>• Stable systemic conditions (For example: Diabetes Mellitus &amp; Hypertension under control)</li> </ul>                                                                                                                                                                                                                                                                                                                                                                                                                                                                                                                              | <ul style="list-style-type: none"> <li>• Best corrected visual acuity &lt; 6/9 for distance and &lt; N6 for near in either eye</li> <li>• Constant strabismus, amblyopia, nystagmus, an ocular disease in either eye (For example: Glaucoma)</li> </ul>                                          |

110

111 <sup>†</sup> Proficiency with the English language was set as an inclusion criterion as study participants  
 112 were asked to read English passages using ReadAlyzer

113

## 114 **Testing procedures**

115 **Neuro-optometric examination:** A detailed history of the nature of injury and  
116 symptoms during the post-injury period were obtained from the TBI subjects. At the  
117 time of recruitment, subjects with TBI were classified into mild, moderate, and severe  
118 grades based on the Glasgow Coma Scale (GCS), post-traumatic amnesia (PTA) and  
119 loss of consciousness (LOC) reported either in the records of emergency department  
120 or hospital discharge summary or by iterative questioning about the traumatic event to  
121 the subject or subject's caretaker. GCS is a 3- to 15-point scale used to assess a  
122 patient's level of consciousness and neurologic functioning; scoring is based on motor,  
123 verbal, and ocular responses. A score between 13-15 is mild, 9-12 is moderate and 3-  
124 8 is severe. PTA is the time elapsed from injury to the moment when patients can  
125 demonstrate continuous memory of what is happening around them. PTA < 1day is  
126 mild, 1-7 days is moderate and >7 days is severe. Duration of loss of consciousness is  
127 classified as mild (LOC < 30 min), moderate (LOC 30 min to 6 hr.), or severe (LOC >6  
128 hr.).<sup>7,8</sup> In most cases, GCS, PTA and LOC were obtained at the time of admission to  
129 the hospital or from the records of discharge summary and in some cases, the GCS  
130 scale was used to probe the events that occurred during the injury.

131 **Reading eye movement assessment:** Reading eye movements were assessed  
132 objectively using ReadAlyzer™ (Compevo AB, Markvardsgatan, Stockholm, Sweden).  
133 ReadAlyzer consists of infra-red emitters and detectors mounted in a safety goggle. It  
134 can determine the eye positions by sensing several infrared reflections from the  
135 cornea. The measuring speed of the instrument is 60 Hz with a better angular  
136 resolution compared to Visagraph II. Head movements are automatically compensated  
137 for analysis by the ReadAlyzer software.<sup>9-11</sup> Subject wore the eye movement goggles  
138 and the near interpupillary distance was adjusted. The test paragraphs were placed 40  
139 centimetres from the corneal plane or habitual correction centred along the subject's  
140 midline.

141 **Reading test:** Eye movements were recorded while the subject read a short English  
142 paragraph silently. The highest-grade level paragraph (Grade 10 – for adults) was used  
143 for measurement. There were five different passages in Grade 10. The subject read  
144 one practice paragraph following which two trials were made with different passages.  
145 The second trial was taken as the final reading to assure a stable baseline  
146 measurement.<sup>12</sup> A comprehension test comprising 10 “yes” or “no” responses were  
147 also administered to confirm the subject's comprehension. After the recording, the

148 system performed an automatic analysis and provided a report in a **Reading Profile**  
149 format (Figure 1). Reading parameters included fixations per 100 words (progressive  
150 saccades), regressions per 100 words (backward saccades), fixation duration (sec)  
151 which is the average length of time (in parts of a second) the eyes paused or fixated,  
152 reading rate (words per minute), grade level equivalent (GLE) which is the weighted  
153 average of the grade levels for the subject's fixations, regressions and reading rate  
154 yielding a combined grade level, and comprehension (%) which is percentage of  
155 correct answers. Seventy per cent or more was acceptable. There are also large right-  
156 to-left oblique saccadic eye movements called saccades in return-sweep which occur  
157 when one must shift to the next line of print.<sup>11</sup> Age-matched controls with normal  
158 binocular vision parameters were administered with ReadAlyzer test.

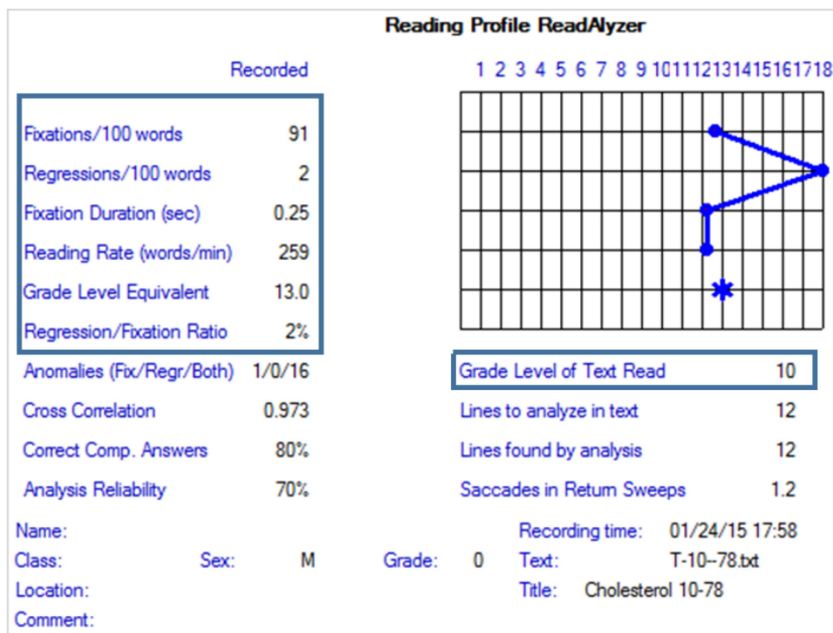

159

160 Figure 1: Reading Profile of a normal subject recorded with ReadAlyzer (Report taken from ReadAlyzer™)

## 161 Statistical Analysis

162 Clinical details of the study participants were entered in Microsoft Excel 2013 and  
163 statistical analyses were performed using SPSS (Statistical Package for Social  
164 Sciences, Version 17.0, SPSS Inc., Chicago). Non-parametric tests were done as the  
165 data did not follow normality (Shapiro-Wilk test). Appropriate coding was generated for  
166 categorical variables. Mann-Whitney U test was used to compare the values between  
167 TBI cases and controls. Kruskal-Wallis test was used to compare the values between

168 different grades of TBI with controls. As the moderate and severe TBI groups had a  
169 lesser sample size, these two groups were combined as MS-TBI for analysis.  
170 Spearman's correlation was used to understand the relationship between variables.  
171 Median and interquartile range values were used to represent the data. The alpha error  
172 was set as 5%.

## 173 **RESULTS**

174 Ninety subjects (30 cases and 60 controls) were included for statistical analysis. The  
175 mean age  $\pm$  SD of the TBI and controls was  $28.7 \pm 8.5$  years (18.4 - 58.9) and  $28.4 \pm$   
176  $7.7$  years (20.4 - 57.0) respectively. The difference in age was not statistically  
177 significant between the two groups (*Chi-square test, p=0.052*). There were 18 mild TBI  
178 (mTBI) and 12 moderate-severe (MS-TBI) (4 moderate and 8 severe) cases of TBI.

### 179 **Aetiologies of TBI**

180 In the present study, road traffic accidents (RTA) (n=24, 80%) was the most common  
181 cause of TBI followed by hit (n=4, 13%) and fall from height (n=2, 7%). All RTA's were  
182 caused merely due to two-wheelers. Four subjects who had a history of an object  
183 striking their head which was defined as hit and two subjects had TBI due to falling  
184 from a height. The median (IQR) post-injury periods of mild, moderate and severe TBI  
185 were 2 (0.6-5), 1.2 (0.5-5.9), 2.5 (0.7-3.7) years respectively.

### 186 **Symptoms of TBI subjects**

187 TBI subjects in the current study self-reported their symptoms which persisted past 6  
188 months from the onset of TBI (Figure 2). In the total TBI sample, reading difficulty (87%)  
189 was the most frequent visual issue followed by eye strain (47%), headache (40%),  
190 vertigo/dizziness (10%) and double vision (10%). A majority of mTBI subjects reported  
191 symptoms of reading difficulty, eyestrain and dizziness, and, MS-TBI subjects had  
192 issues such as a headache primarily followed by reading difficulty and eye strain (Table  
193 2).

194

195

196

197

198



199 **Table 2: Symptoms in mild TBI and moderate-severe TBI**

200

| Symptoms           | mTBI †    | MS-TBI ‡ |
|--------------------|-----------|----------|
|                    | n (%)     | n (%)    |
| Reading difficulty | 18 (100)  | 9 (75)   |
| Eye strain         | 14 (77.5) | 10 (83)  |
| Headache           | 12 (66.7) | 12 (100) |
| Vertigo/Dizziness  | 0         | 3 (25)   |
| Double vision      | 0         | 7 (58)   |

201

† mTBI – Mild TBI; ‡ MS-TBI – Moderate-Severe TBI

202

203

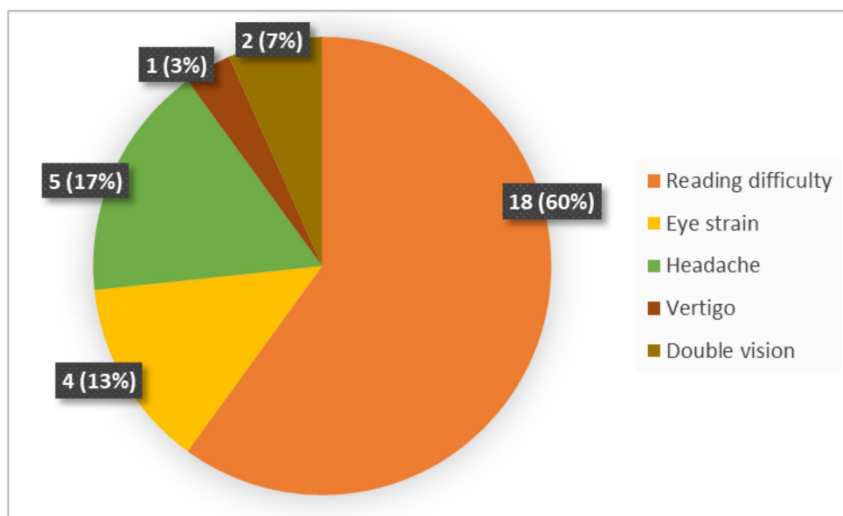

204

205 Figure 2: Symptoms of all TBI subjects [n (%)]

206

## 207 Reading Eye Movement parameters: TBI vs Controls

208 The results of the oculomotor-based reading eye movement assessment using  
209 ReadAlyzer™ were compared with age-matched controls (Table 3). Subjects with TBI  
210 presented with increased number of fixations/100 words: 137 (106-159),  
211 regressions/100 words: 24 (12-36), reduced reading rate of 154 (128-173) words per  
212 minute, lesser comprehension: 70 (60-80) percentage, lower grade level equivalent:  
213 4.0 (3.0-7.0) and increased return sweep saccades: 1.7 (1.2-2.4) [*represented in*  
214 *median (IQR); p <0.01*].

215 To understand the reading eye movements based on the severity of TBI, a comparison  
216 between three groups (controls, mTBI and MS-TBI) was conducted which showed a  
217 significant difference between the three groups ( $p < 0.01$ ) (Table 4). Post hoc analysis  
218 revealed a significant difference between controls and mTBI ( $p < 0.01$ ), controls and MS-  
219 TBI ( $p < 0.01$ ) and no statistically significant difference was noted between mTBI and  
220 MS-TBI ( $p = 0.43$ ).

221 **Table 3: Comparison of Reading test parameters obtained from ReadAlyzer**  
222 **between controls and TBI**

| Reading test parameters         | TBI †               | Controls            | p*     |
|---------------------------------|---------------------|---------------------|--------|
|                                 | Median (IQR) [n=30] | Median (IQR) [n=60] |        |
| Fixations/100 words (No.)       | 137 (106-159)       | 92 (76-102)         | <0.001 |
| Regressions/100 words (No.)     | 24 (12-36)          | 10 (7-14)           | <0.001 |
| Fixation Duration (sec)         | 0.30 (0.27-0.33)    | 0.29 (0.27-0.32)    | 0.2    |
| Reading rate (words per min)    | 154 (128-173)       | 214 (199-244)       | <0.001 |
| Comprehension (%)               | 70 (60-80)          | 90 (70-100)         | 0.008  |
| Grade Level Equivalent (GLE)    | 4.0 (3.0-7.0)       | 10.0 (8.0-12.0)     | <0.001 |
| Saccades in Return Sweeps (No.) | 1.7 (1.2-2.4)       | 1.5 (1.3-1.8)       | 0.022  |

223 \* *Mann-Whitney U test; p value represents the statistical significance for the comparison between*  
224 *TBI and control groups*

225 † *TBI – Traumatic Brain Injury*

226 **Table 4: Comparison of Reading test parameters obtained from ReadAlyzer**  
 227 **between controls, mTBI and MS-TBI**

| Reading test parameters            | Controls               | mTBI †                 | MS-TBI ‡               | p**    |
|------------------------------------|------------------------|------------------------|------------------------|--------|
|                                    | Median (IQR)<br>[n=60] | Median (IQR)<br>[n=18] | Median (IQR)<br>[n=12] |        |
| Fixations/100 words (No.)          | 92 (76-102)            | 128 (103-147)          | 149 (117-160)          | <0.001 |
| Regressions/100 words<br>(No.)     | 10 (7-14)              | 20 (10-30)             | 27 (16-38)             | <0.001 |
| Fixation Duration (sec)            | 0.29 (0.27-<br>0.32)   | 0.30 (0.27-<br>0.33)   | 0.30 (0.27-0.33)       | 0.48   |
| Reading rate (words per<br>min)    | 214 (199-244)          | 162 (135-184)          | 147 (116-165)          | <0.001 |
| Comprehension (%)                  | 90 (70-100)            | 80 (60-90)             | 70 (60-80)             | 0.02   |
| Grade Level Equivalent<br>(GLE)    | 10 (8.0-12.0)          | 5.5 (3.0-7.2)          | 3.5 (3.0-4.0)          | <0.001 |
| Saccades in Return<br>Sweeps (No.) | 1.5 (1.3-1.8)          | 1.9 (1.3-2.3)          | 1.6 (1.2-2.4)          | 0.001  |

228

229 \*\* Kruskal Wallis test; p value represents the statistical significance for the comparison  
 between mTBI, MS-TBI and control groups

230

Post hoc analysis revealed a significant difference between controls and mTBI, controls and MS-TBI (Mann Whitney U test,  $p < 0.05$ ) and no difference was noted between mTBI and MS-TBI.

† mTBI – Mild TBI; ‡ MS-TBI – Moderate-Severe TBI; p – p value

231 **Correlation between number of fixations per line and reading rate in TBI**

232 The relationship between the number of fixations/100 words and reading rate in TBI  
233 subjects showed a significantly strong negative correlation (Figure 3) (Spearman's  
234 correlation,  $r = -0.823$ ,  $n=30$ ,  $p= <0.001$ ) in subjects with TBI.

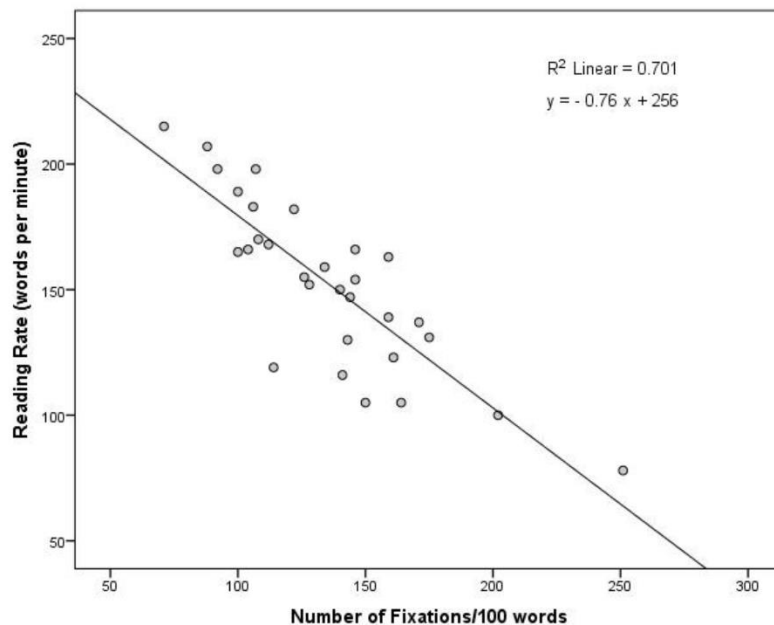

235

236 Figure 3: Correlation between number of fixations per line and reading rate in TBI

237

238 **DISCUSSION**

239 In our study, reading eye movement parameters in subjects with TBI were evaluated  
240 and compared with age-matched controls. The current research is the first to study and  
241 report eye movement parameters during reading in TBI in India.

242 It is important to address the physical and visual issues following TBI as it can result in  
243 morbidity, mortality, disability and socioeconomic losses in many developing  
244 countries.<sup>13</sup> In India, an assessment of injury pattern of RTAs that had collisions  
245 tangled with head injuries was caused frequently by two-wheelers (62%) and less likely  
246 by four-wheelers (12%);<sup>14</sup> whereas, in western countries, most of the accidents were  
247 found due to four-wheelers (79%). In the present study, twenty-four subjects (80%)  
248 reported RTA due to two-wheelers and were diagnosed to have TBI. This scenario is

249 due to the unprecedented motorization and unacceptance of safety policies among the  
250 two-wheeler drivers.<sup>14,15</sup>

251 Reading is an essential task in every individual's life. Any mishap due to TBI can affect  
252 the oculomotor system resulting in reading difficulty and affect the quality of life (QoL).  
253 <sup>16,17</sup> There were scenarios in the current study were subjects with TBI (60%) gave up  
254 their regular reading habits due to troubling eye-related symptoms. Therefore, we  
255 studied reading eye movement parameters in subjects with TBI and the results from  
256 our study showed that eye movements are affected. This, in turn, affected the  
257 naturalistic reading ability of a compromised individual compared to a normal.

258 The evaluation of clinically-based reading eye movements has provided insight into the  
259 functional integrity of the brain. ReadAlyzer™ was used to evaluate the reading eye  
260 movements. It has been a valid, clinical tool that provided consistent, objective and  
261 automated results on reading eye movement parameters. The advantage of this  
262 instrument is that the infrared cameras have allowed real-time observation of eye  
263 movements during recording. Dynamics of saccades such as saccadic latency and  
264 accuracy are also known to be affected by ageing.<sup>18</sup> Therefore, study sample  
265 recruitment was done by ensuring that controls were age-matched to a TBI subject. We  
266 also correlated reading eye movement parameters with age, but results did not reveal  
267 any significant correlation with age.

268 For a subject with normal visual function, based on their grade level, the expected  
269 reading rate is 250-280 words per minute with 90 fixations per 100 words and 15  
270 regressions per 100 words according to Taylor's normative data for the adult American  
271 population.<sup>2</sup> In the present study, controls also had a lesser reading rate: 214 (199-244)  
272 words per minute compared to an established Taylor's normative data. These  
273 differences suggested that reading an English text is based on the familiarity with  
274 language and vocabulary. <sup>2</sup> As English is a second language in India, the fluency and  
275 speed of reading are variable when compared to native English speakers. Hence,  
276 reading eye movement parameters of TBI subjects were assessed by comparing with  
277 age-matched controls due to the lack of evident age-based normal reading rate for our  
278 population. All the subjects (TBI and controls) in the present study were ensured that  
279 they held a basic degree with fluency in English. Individuals with TBI in the present  
280 study demonstrated significantly reduced reading rate, increased number of fixations,  
281 and a higher number of regressions. The results suggested that subjects with TBI had  
282 a low degree of saccade automation, and they resulted in making an excessive number

283 of unwanted saccades which reflected in their reading. Studies explained that the low  
284 gain in the saccadic amplitude of the primary saccade resulted in a hypometric  
285 saccade. Therefore, a corrective subsequent saccade was made to achieve the  
286 anticipated saccadic amplitude.<sup>1,19</sup> These corrective saccades resulted in an increased  
287 number of fixations and regressions with poor reading eye movements. Subjects with  
288 TBI also had reduced comprehension which revealed a problem with inference and  
289 short-term memory in answering the questions along with basic demands of  
290 oculomotor coordination compared to controls.<sup>11</sup> With all these parameters being  
291 reduced, the grade level equivalent was also lesser in subjects with TBI, as they read 5  
292 grade levels lesser than controls. This finding of an increased number of inaccurate  
293 reading eye movements is consistent with a study reported by Thiagarajan, et al. on  
294 mTBI population which were measured using Visagraph (2014).<sup>1</sup> It was reported that  
295 during reading, an individual with TBI exhibits hypometric saccades (<1 degree in  
296 amplitude),<sup>1,20</sup> increased saccadic latencies (>200 msec), increased number of  
297 fixations (>90 per 100 words), regressions (>12 per 100 words) and reduced reading  
298 rate (<250 words per minute).<sup>1</sup>

299 The information on clinically-based reading eye movements when translated into the  
300 natural reading process helped us to interpret reading dysfunction. Comparison of  
301 reading eye movement parameters between mild TBI (mTBI) vs. moderate and severe  
302 TBI (MS-TBI) with controls highlights that the oculomotor system is compromised both  
303 in mTBI and MS-TBI. Mild TBI and MS-TBI did not show any statistically significant  
304 difference even though the outcome measures were relatively affected in MS-TBI.  
305 Alternatively, the extent of reading dysfunction in TBI might not be truly dependent on  
306 injury severity. There lies a possibility that visual functions are vulnerable to damage  
307 regardless of the severity of the injury. Similarly, the symptoms of reading difficulty  
308 were more profound in mTBI compared to MS-TBI inferencing that mTBI is also  
309 affected like MS-TBI. It has been described that the susceptibility of extensive neural  
310 networks affected the multiple brain regions associated with control, execution,  
311 initiation and generation of saccades leading to reading dysfunction.<sup>1,3</sup>

## 312 **CONCLUSION**

313 This study adds evidence to the impaired reading eye movement performance in TBI  
314 invariable to the severity. ReadAlyzer, being a simple instrument has helped us to  
315 understand the quantitative reading parameters in TBI. It has been highlighted in the  
316 present study that reading is affected in all severity of TBI. The degree of reading

317 impairment increased with the severity of the injury as an important clinical finding.  
318 These clinically-based reading eye movements were addressed previously in mTBI, but  
319 not in MS-TBI using ReadAlyzer. Oculomotor testing is thus sensitive to detect subtle  
320 defects in all grades of TBI.

321 Having understood about the visual sequelae in TBI, it is also important to rehabilitate  
322 these subjects with oculomotor vision therapy. Studies have shown that oculomotor  
323 rehabilitation can significantly improve overall reading and result in behavioural  
324 changes with a progressive effect on the QoL.<sup>1,20-22</sup> This improvement has also been  
325 observed in a case of mTBI with convergence insufficiency and reading dysfunction  
326 that we reported.<sup>23</sup> Neuro-optometric vision therapy facilitated the subject to  
327 recuperate from the compromised state and perform better in his daily living activities.

328 The limitations of the study include inadequate sample size in moderate and severe  
329 TBI groups. Visual symptoms were not quantified using a validated questionnaire used  
330 for TBI. Subjects with English language proficiency were only used as the reading  
331 passages were in English. Test paragraph with different regional languages that match  
332 the corresponding grade level equivalent may serve for non-English proficiency  
333 subjects.

334 An extensive future research in the objective assessment of eye movements in TBI  
335 may help neuro-optometrists to understand the occurrence of deficits in reading eye  
336 movements. This may also help the clinicians to evaluate the reading deficits in the  
337 regular neuro-optometric work up and also to monitor recovery/improvement with  
338 intensive neuro-optometric intervention.

### 339 **ACKNOWLEDGEMENTS**

340 The authors would like to acknowledge Mr Kurt Mirdell, Developer of Visagraph II and  
341 ReadAlyzer for answering technical queries.

### 342 **Conflicts of Interest Disclosure**

343 No potential conflict of interest was reported by the authors.

### 344 **Funding Sources Disclosure**

345 There are no financial conflicts of interest to disclose.

346

347 **REFERENCES**

- 348 1. Thiagarajan P., Ciuffreda K. J., Capo-Aponte, J. E., et al. Oculomotor  
349 neurorehabilitation for reading in mild traumatic brain injury (mTBI): An  
350 integrative approach. *NeuroRehabilitation* 2014; 34:129–146.
- 351 2. Taylor S. E. Eye Movements in Reading: Facts and Fallacies. *Am. Educ. Res. J*  
352 1965; 2,187–202.2875251
- 353 3. Ciuffreda K. J., Kapoor N., Rutner D., et al. Occurrence of oculomotor  
354 dysfunctions in acquired brain injury: A retrospective analysis. *Optometry* 2007;  
355 78, 155–161.
- 356 4. Mani R., Asper L., Khuu SK. Deficits in saccades and smooth-pursuit eye  
357 movements in adults with traumatic brain injury: a systematic review and meta  
358 analysis. *Brain Injury* 2018, DOI: 10.1080/02699052.2018.1483030
- 359 5. Mullen S. J., Yücel Y.H., Cusimano M., et al. Saccadic eye movements in mild  
360 traumatic brain injury: A pilot study. *Can. J. Neurol. Sci* 2014; 41, 58–65.
- 361 6. Thiagarajan P., Ciuffreda K. J. Versional eye tracking in mild traumatic brain  
362 injury (mTBI): effects of oculomotor training (OMT). *Brain Inj* 2014; 28, 930–43.
- 363 7. Friedland D., Hutchinson P. Classification of traumatic brain injury [monograph  
364 on the Internet]. *Advances in Clinical Neuroscience and Rehabilitation*; 2013  
365 [cited on 17 September 2013] Available from:  
366 <http://www.acnr.co.uk/2013/07/classification-of-traumatic-brain-injury/>
- 367 8. Heitger M. H, Jones R.D., Dalrymple-Alford J. C., et al. Motor deficits and  
368 recovery during the first year following mild closed head injury. *Brain Inj* 2006;  
369 20, 807–824.
- 370 9. Colby D., Laukkanen. H, Yolton RL. Use of the Taylor Visagraph II system to  
371 evaluate eye movements made during reading. *J Am Optom Assoc* 1998; 69,  
372 22-32.
- 373 10. Webber A., Wood J., Gole G. et al. DEM Test, Visagraph Eye Movement  
374 Recordings, and Reading Ability in Children. *Optom. Vis. Sci* 2011; 88, 295-302
- 375 11. Eye Movement Recording system with automatic Reading analysis [monograph  
376 on the Internet]. *ReadAlyzer –Compevo A*; 2013. [cited on 10 May 2017]  
377 Available from: [www.compevo.se/ReadAlyzerInfo.pdf](http://www.compevo.se/ReadAlyzerInfo.pdf)
- 378 12. Ciuffreda, M. A., Ciuffreda, K. J., Santos, D. Visagraph: Baseline Analysis &  
379 Procedural Guidelines. *J. Behav. Optom* 2003; 14, 60–64.
- 380 13. Gururaj, G. Epidemiology of traumatic brain injuries: Indian scenario.  
381 *Neurological research* 2002, 24, 24-28.



- 382 14. Hsiao M., Malhotra A., Thakur JS., et al. Road traffic injury mortality and its  
383 mechanisms in India: nationally representative mortality survey of 1.1 million  
384 homes. *BMJ Open* 2013; 3: e002621.
- 385 15. Mohan, D. Traffic safety and health in Indian cities. *J Transport. Infrastructure*  
386 2002; 9, 79-94.
- 387 16. Goodrich, G. L., Flyg, H. M., Kirby, J. E., et al. Mechanisms of TBI and visual  
388 consequences in military and veteran populations *Optom. Vis. Sci.* 2013; 90,  
389 105–12.
- 390 17. Stelmack, J. A., Frith, T., Van Koevering, D., et al. R. Visual function in patients  
391 followed at a Veterans Affairs polytrauma network site: An electronic medical  
392 record review. *Optometry* 2009; 80, 419–424.
- 393 18. Irving, E. L., Steinbach, M. J., Lillakas, L., et al. Horizontal saccade dynamics  
394 across the human lifespan. *Investig Ophthalmol Vis Sci* 2006; 47, 2478–2484
- 395 19. Thiagarajan P., Ciuffreda, K.J. Effect of oculomotor rehabilitation on vergence  
396 responsivity in mild traumatic brain injury. *J Rehabil Res Dev* 2013; 50, 1223-  
397 1240.
- 398 20. Ciuffreda, K. J., Tannen, B. *Eye Movement Basics for the Clinician*, 1st ed.  
399 Mosby Publishers, St. Louis, MO. 1995.
- 400 21. Brahm, K. D., Wilgenburg, H. M., Kirby. Visual impairment and dysfunction in  
401 combat-injured servicemembers with traumatic brain injury. *Optom Vis Sci*  
402 2009; 86, 817-82
- 403 22. Thiagarajan P., Ciuffreda, K.J. Effect of oculomotor rehabilitation on  
404 accommodative responsivity in mild traumatic brain injury. *J Rehabil Res Dev*  
405 2014; 51, 175-192
- 406 23. Mani R, Reddy AVC, Hussaindeen JR, Priyadarshini DS. Management of  
407 convergence insufficiency and oculomotor dysfunction: A neuro-optometric  
408 perspective. *Optom Vis Perf* 2017; 5:96-104.

409

410

411 **Corresponding author name and e-mail address:**

412 Jameel Rizwana Hussaindeen

413 Email address: [rizwana@snmail.org](mailto:rizwana@snmail.org)

414
